# Supplementary material for: Chemical Structure of Stabilizing Layers of Negatively Charged Silver Nanoparticles as an Effector of Shifts in Soil Bacterial Microbiome under Short-Term Exposure
Source: MDPI journal article supplement (doi:10.3390/ijerph192114438), 2022-11-04
Supplement: s1 [file s1]

**Figure S1.** Proportion analysis (soil untreated vs. treated) of metagenome on genus level.

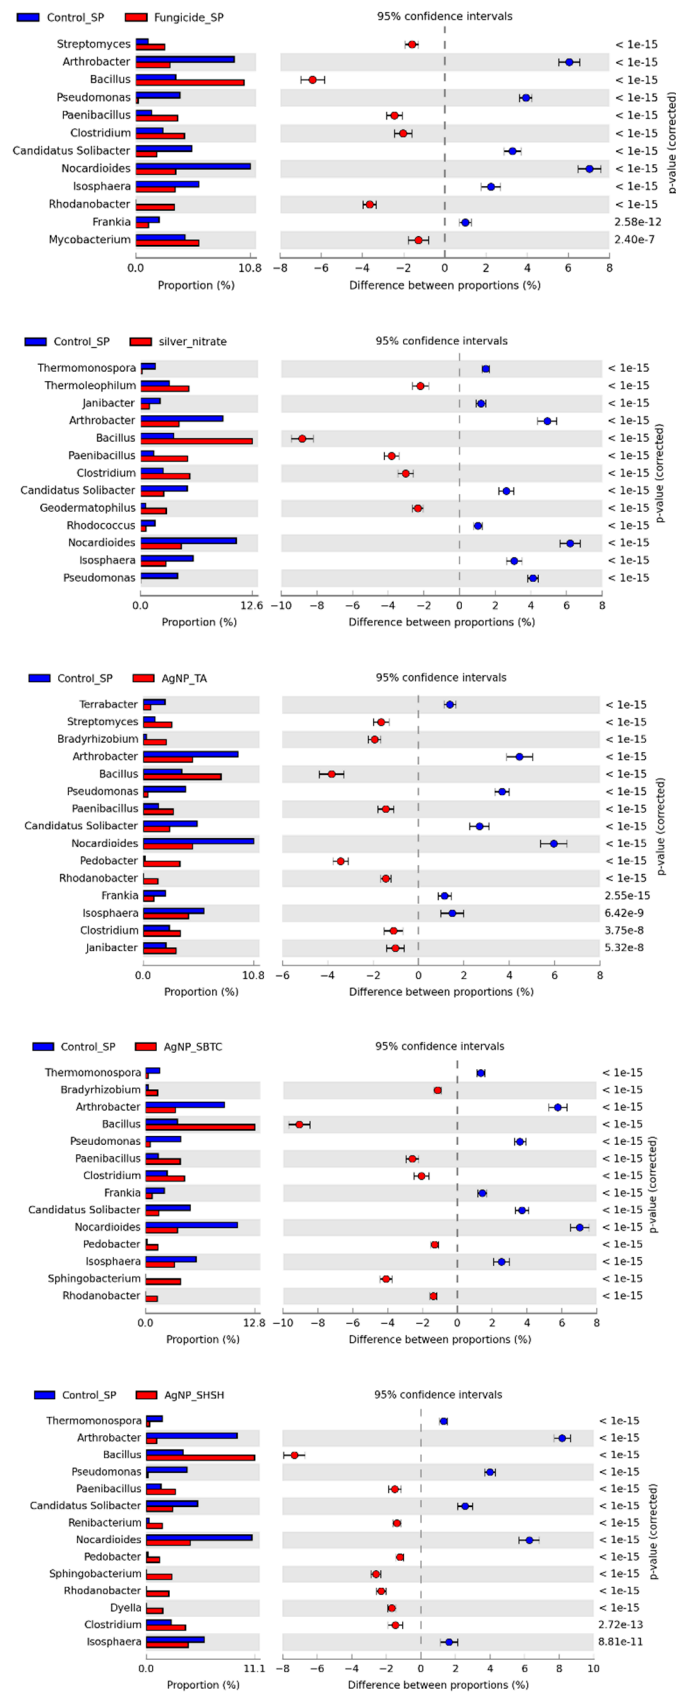

**Table S1.** Shifts in soil bacteria structure depending on the treatment on species level.

| Treatment |           |                |         |           |           |       | SPECIES                                   |
|-----------|-----------|----------------|---------|-----------|-----------|-------|-------------------------------------------|
| Control   | Fungicide | Silver nitrate | AgNP-TA | AgNP-SBTC | AgNP-SHSH | MEAN  |                                           |
| 29.49     | 37.73     | 27.42          | 34.05   | 37.53     | 46.65     | 35.72 | uncultured bacterium                      |
| 0.92      | 11.31     | 0.69           | 16.17   | 2.93      | 2.89      | 6.18  | uncultured gamma proteobacterium          |
| 4.85      | 7.17      | 0.65           | 3.67    | 3.62      | 1.89      | 3.91  | uncultured soil bacterium                 |
| 3.30      | 1.38      | 1.76           | 1.75    | 1.62      | 1.82      | 1.95  | Isosphaera pallida                        |
| 1.80      | 1.54      | 3.35           | 1.58    | 1.58      | 1.27      | 1.79  | Thermoleophilum album                     |
| 2.08      | 0.90      | 2.94           | 1.72    | 2.02      | 1.11      | 1.73  | uncultured delta proteobacterium          |
| 0.81      | 1.45      | 3.22           | 1.30    | 1.21      | 1.56      | 1.51  | Bacillus circulans                        |
| 2.93      | 0.74      | 1.63           | 1.02    | 0.74      | 1.14      | 1.36  | Candidatus Solibacter usitatus            |
| 1.02      | 1.20      | 1.86           | 1.36    | 1.39      | 1.01      | 1.28  | uncultured alpha proteobacterium          |
| 1.77      | 1.10      | 0.53           | 0.81    | 1.35      | 1.00      | 1.13  | uncultured beta proteobacterium           |
| 3.07      | 0.31      | 0.93           | 0.61    | 0.39      | 0.53      | 0.99  | Nocardioides sp. MTD22                    |
| 1.23      | 0.51      | 0.62           | 1.27    | 0.97      | 1.28      | 0.98  | Janibacter sp. BY48                       |
| 1.30      | 0.84      | 1.14           | 0.92    | 0.80      | 0.82      | 0.97  | Candidatus Koribacter versatilis          |
| 1.77      | 0.58      | 1.06           | 0.77    | 0.73      | 0.75      | 0.94  | Nocardioides albus                        |
| 4.00      | 0.84      | 0.01           | 0.01    | 0.01      | 0.02      | 0.90  | Arthrobacter sp. FB24                     |
| 0.76      | 0.69      | 1.52           | 0.60    | 0.80      | 0.87      | 0.84  | Clostridium botulinum                     |
| 0.19      | 0.06      | 2.30           | 1.42    | 1.21      | 0.09      | 0.79  | Arthrobacter globiformis                  |
| 0.78      | 0.43      | 1.40           | 0.46    | 0.51      | 0.52      | 0.65  | Chthoniobacter flavus                     |
| 1.22      | 0.42      | 0.80           | 0.41    | 0.36      | 0.67      | 0.64  | Frankia sp.                               |
| 0.00      | 1.37      | 0.00           | 0.57    | 0.65      | 0.97      | 0.63  | Rhodanobacter lindaniclasticus            |
| 1.71      | 0.32      | 0.60           | 0.19    | 0.15      | 0.39      | 0.57  | uncultured proteobacterium                |
| 0.32      | 0.32      | 1.80           | 0.54    | 0.19      | 0.53      | 0.56  | Geodermatophilus obscurus                 |
| 0.26      | 0.61      | 0.94           | 0.26    | 0.52      | 0.58      | 0.51  | uncultured Rhodocyclaceae bacterium       |
| 0.02      | 0.53      | 0.07           | 0.71    | 0.85      | 0.71      | 0.49  | Sphingobacteriaceae bacterium SOC A20(36) |
| 0.11      | 0.32      | 0.24           | 0.23    | 1.60      | 0.47      | 0.49  | Bacillus megaterium                       |
| 1.02      | 0.28      | 0.90           | 0.16    | 0.34      | 0.27      | 0.48  | Terrabacter tumescens                     |

|      |      |      |      |      |      |      |                                  |
|------|------|------|------|------|------|------|----------------------------------|
| 0.54 | 0.46 | 0.75 | 0.38 | 0.41 | 0.28 | 0.46 | Seinonella peptonophila          |
| 0.04 | 0.19 | 0.02 | 1.38 | 0.54 | 0.55 | 0.46 | Pedobacter heparinus             |
| 0.78 | 0.23 | 0.95 | 0.33 | 0.26 | 0.28 | 0.45 | bacterium Ellin514               |
| 0.00 | 0.06 | 0.05 | 0.06 | 1.54 | 1.02 | 0.45 | Sphingobacterium sp. TN19        |
| 0.19 | 0.36 | 1.02 | 0.30 | 0.54 | 0.26 | 0.42 | Paenibacillus alginolyticus      |
| 0.41 | 0.25 | 0.86 | 0.32 | 0.33 | 0.34 | 0.40 | Pirellula staleyi                |
| 0.41 | 0.45 | 0.58 | 0.15 | 0.42 | 0.31 | 0.38 | Atopobium minutum                |
| 0.93 | 0.50 | 0.12 | 0.30 | 0.15 | 0.15 | 0.38 | Thermomonospora curvata          |
| 0.55 | 0.49 | 0.24 | 0.33 | 0.27 | 0.29 | 0.37 | uncultured forest soil bacterium |
| 0.59 | 0.19 | 0.60 | 0.31 | 0.25 | 0.36 | 0.37 | Pseudonocardia zijingensis       |
| 0.36 | 0.35 | 0.41 | 0.43 | 0.34 | 0.10 | 0.33 | Ruminococcus bromii              |
| 0.17 | 0.43 | 0.52 | 0.21 | 0.35 | 0.32 | 0.33 | Micromonospora chokoriensis      |
| 0.22 | 0.18 | 0.38 | 0.39 | 0.45 | 0.40 | 0.33 | Streptosporangium roseum         |
| 0.17 | 0.30 | 0.46 | 0.24 | 0.43 | 0.28 | 0.31 | Paenibacillus polymyxa           |
| 1.66 | 0.00 | 0.00 | 0.00 | 0.00 | 0.04 | 0.31 | Pseudomonas sp. HS100            |
| 0.27 | 0.24 | 0.30 | 0.25 | 0.33 | 0.29 | 0.28 | Sporanaerobacter acetigenes      |
| 0.20 | 0.15 | 0.69 | 0.16 | 0.25 | 0.25 | 0.26 | Microbacterium aurum             |
| 0.06 | 0.32 | 0.71 | 0.06 | 0.40 | 0.08 | 0.25 | Bacillus sp. SH3                 |
| 0.24 | 0.24 | 0.30 | 0.27 | 0.23 | 0.22 | 0.25 | Nocardiopsis alba                |
| 0.15 | 0.14 | 0.05 | 0.13 | 0.78 | 0.22 | 0.25 | Terrabacter sp. YK3              |
| 0.44 | 0.10 | 0.15 | 0.05 | 0.06 | 0.67 | 0.24 | Bacillus flexus                  |
| 0.25 | 0.23 | 0.22 | 0.26 | 0.19 | 0.31 | 0.24 | Roseiflexus castenholzii         |
| 0.14 | 0.21 | 0.46 | 0.21 | 0.27 | 0.22 | 0.24 | Bacillus simplex                 |
| 0.38 | 0.30 | 0.34 | 0.10 | 0.16 | 0.12 | 0.24 | Nocardioides sp.                 |
| 0.25 | 0.12 | 0.16 | 0.15 | 0.56 | 0.17 | 0.23 | Rhodococcus opacus               |
| 0.32 | 0.04 | 0.36 | 0.23 | 0.26 | 0.25 | 0.23 | Nocardioides sp. DN36            |
| 0.07 | 0.24 | 0.36 | 0.19 | 0.35 | 0.23 | 0.23 | Ureibacillus thermosphaericus    |
| 0.20 | 0.15 | 0.35 | 0.29 | 0.23 | 0.19 | 0.23 | Desulfitobacterium hafniense     |
| 0.17 | 0.23 | 0.55 | 0.22 | 0.12 | 0.13 | 0.23 | Desulfonispota thiosulfatigenes  |
| 0.16 | 0.13 | 0.35 | 0.33 | 0.10 | 0.32 | 0.22 | Microlunatus phosphovorus        |

|      |      |      |      |      |      |      |                          |
|------|------|------|------|------|------|------|--------------------------|
| 0.14 | 0.31 | 0.10 | 0.22 | 0.28 | 0.21 | 0.22 | Bacillus cereus          |
| 0.20 | 0.17 | 0.21 | 0.29 | 0.22 | 0.18 | 0.21 | Rubrobacter xylanophilus |
| 0.43 | 0.12 | 0.10 | 0.17 | 0.21 | 0.17 | 0.20 | Arthrobacter oxydans     |
| 0.06 | 0.19 | 0.63 | 0.06 | 0.33 | 0.06 | 0.20 | Kribbella jejuensis      |
